# Supplementary material for: Spectroscopic and thermodynamic characterization of a cobalt-verdazyl valence tautomeric system. influence of crystal structure, solvent and counterion
Source: Royal Society of Chemistry journal article supplement (doi:10.1039/d4dt00465e), 2024-01-01
Supplement: d4dt00465e1.pdf [file d4dt00465e1.pdf]

## Spectroscopic and Thermodynamic Characterization of a Cobalt-Verdazyl Valence Tautomeric System. Influence of Crystal Structure, Solvent and Counterion.

David Brook<sup>a</sup>, Jeffrey DaRos<sup>a</sup>, Aamani Ponnekanti<sup>a</sup>, Stefano Agrestini<sup>c</sup>, Eric Pellegrin<sup>c</sup>

Department of Chemistry, San Jose State University, San Jose, CA 95192, USA

ALBA Synchrotron Light Source, E-08290 Cerdanyola del Vallès, Barcelona, Spain

### Supporting Information

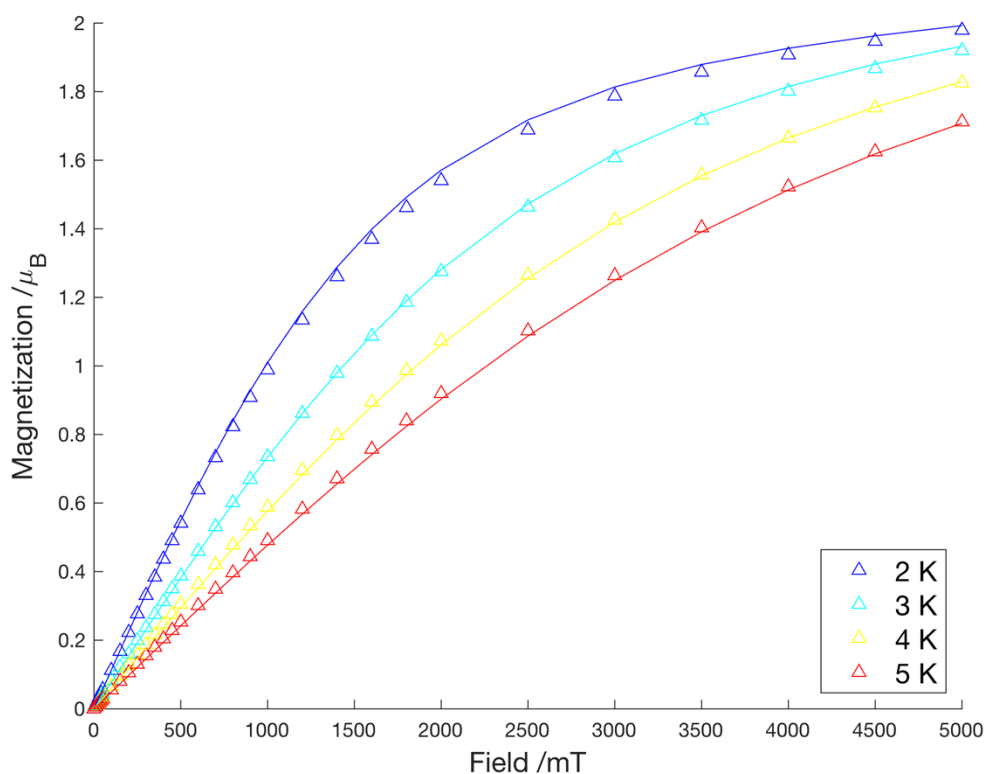

**Figure S1.** Magnetization vs. Field at 2-5 K for  $[\text{Co}(\text{dipyvd})_2](\text{PF}_6)_2$ . Solid lines are calculated for an  $S=3/2$  system with  $g_{\text{iso}}=2.0$ ,  $D=18 \text{ cm}^{-1}$ ,  $E/D=0.05$

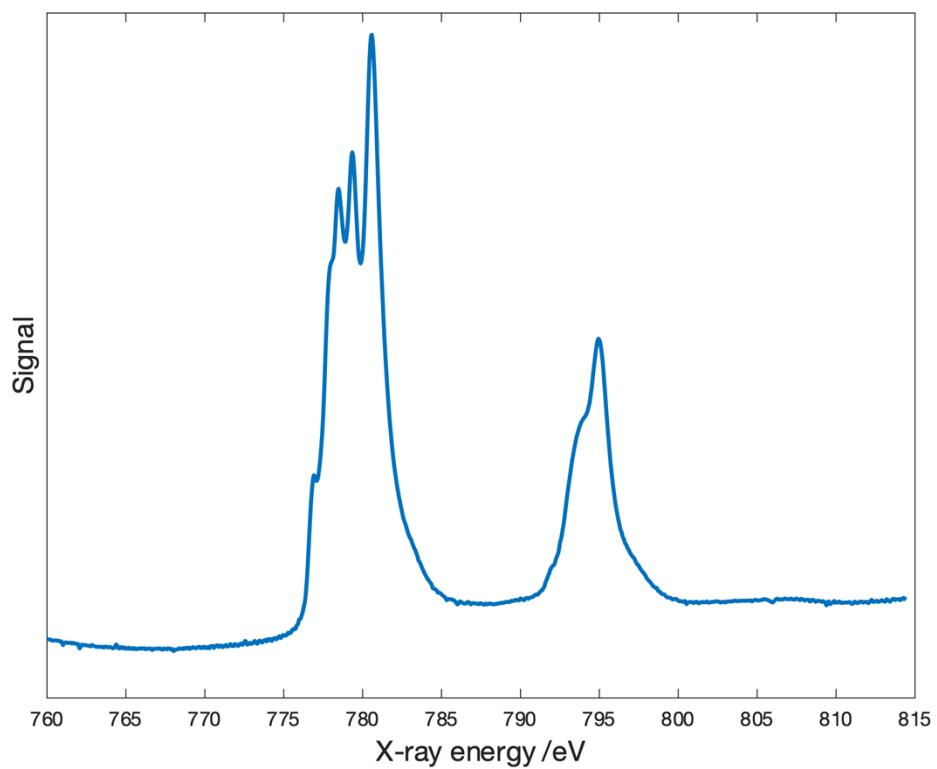

**Figure S2.** X-ray absorption spectrum for [Co(dipyvd)<sub>2</sub>](PF<sub>6</sub>)<sub>2</sub> recorded at 2K
